# Supplementary material
Source: ML conference proceedings conference paper supplement (https://openaccess.thecvf.com/content/WACV2023/html/Susladkar_GAFNet_A_Global_WACV_2023_paper.html)
Supplement: Supplementary file 1 [file Susladkar_GAFNet_A_Global_WACV_2023_supplemental.pdf]

GAFNet, a novel generative adversarial network, effectively embeds natural language descriptions into the image-to-image translation of objects and visual attributes. Experimental results show that GAFNet can effectively generate the high-quality desired images semantically consistent with given descriptions, as shown below:

| Text                                                         | GAFNet                                                                               | ViLBERT                                                                               |
|--------------------------------------------------------------|--------------------------------------------------------------------------------------|---------------------------------------------------------------------------------------|
| <p><b>Giraffe</b> is grazing on <b>grass</b> field</p>       |    |    |
| <p>The <b>bus</b> is on the empty <b>road</b></p>            |    |    |
| <p>The <b>white ball</b> is in <b>air</b></p>                |   |   |
| <p><b>elephant</b> is crossing the <b>street</b></p>         |  |  |
| <p><b>Black and white dog</b> is chasing the <b>ball</b></p> |  |  |
